# Supplementary material for: Highly efficient Zn:CuInSe2/ZnS quantum dots for near-infrared optical wireless communications
Source: Royal Society of Chemistry journal article supplement (doi:10.1039/d4tc05224b), 2025-01-01
Supplement: d4tc05224b1.pdf [file d4tc05224b1.pdf]

## Supplementary Information

### Highly efficient Zn: CuInSe<sub>2</sub>/ZnS quantum dots for near-infrared optical wireless communications

Lizhao Nie,<sup>a,b</sup> Linqi Chen,<sup>\*b</sup> Jingzhou Li,<sup>\*c</sup> Yijing Wang,<sup>c</sup> Xiaoxia Wang,<sup>\*a</sup> Long Zhang,<sup>b,c</sup> Hongxing Dong<sup>b,c</sup> and Anlian Pan<sup>\*a,d</sup>

<sup>a</sup> College of Materials Science and Engineering, Hunan University, Changsha 410082, China.

<sup>b</sup> Key Laboratory of Materials for High-Power Laser, Shanghai Institute of Optics and Fine Mechanics, Chinese Academy of Sciences, Shanghai 201800, China.

<sup>c</sup> Hangzhou Institute for Advanced Study, University of Chinese Academy of Sciences, No.1, Sub-Lane Xiangshan, Xihu District, Hangzhou 310024, China.

<sup>d</sup> School of Physics and Electronics, Hunan Normal University, Changsha 410081, China.

\* Corresponding author: chenlq@siom.ac.cn; lijingzhou@ucas.ac.cn; wangxiaoxia@hnu.edu.cn; Anlian.Pan@hnu.edu.cn

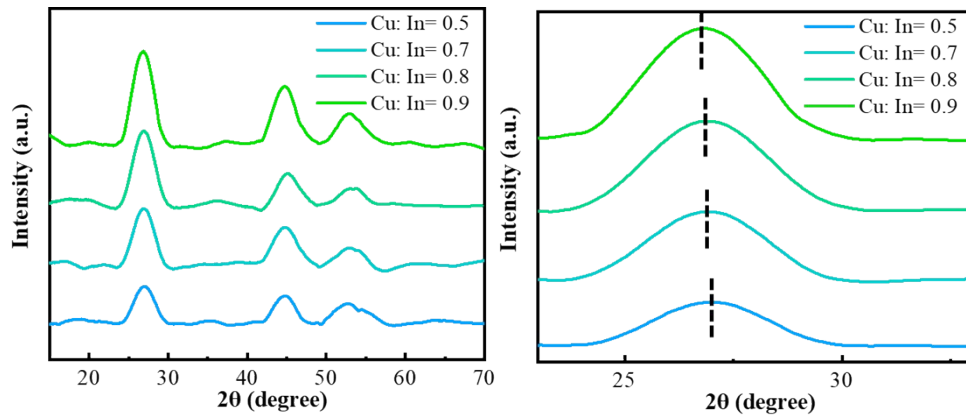

**Fig. S1** Characteristic peak diffraction angles in XRD spectra shift to smaller angles with increasing copper ratio.

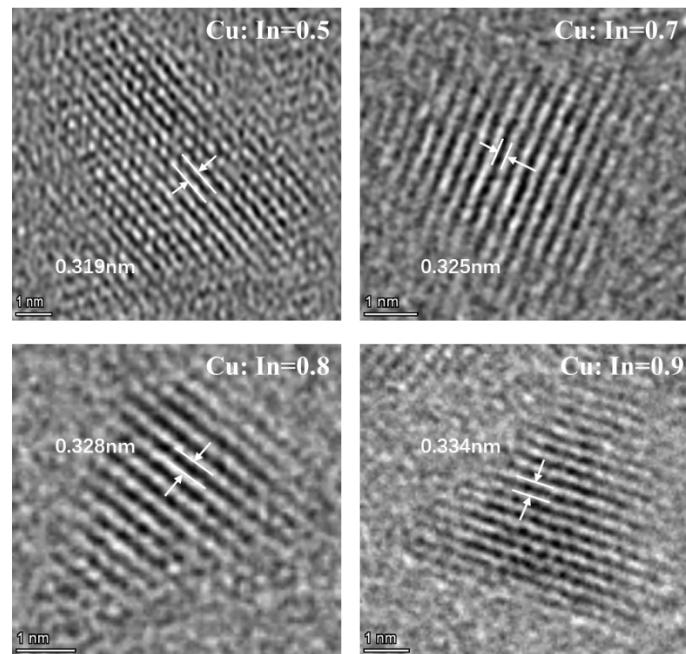

**Fig. S2** Interplanar spacing of quantum dots gradually increases with increasing copper ratio.

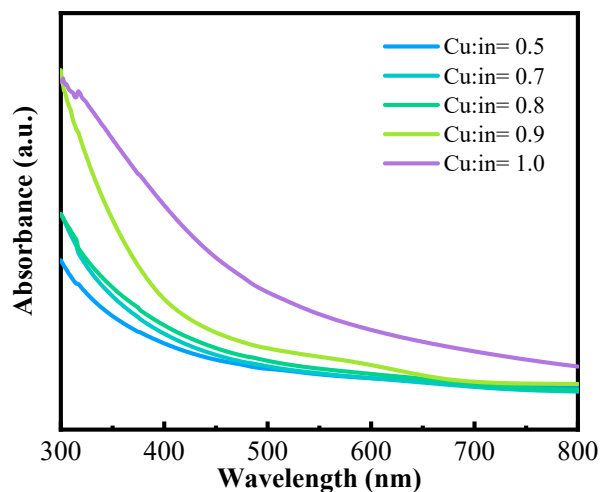

**Fig. S3** The variation of the absorption spectrum of Zn: CuInSe<sub>2</sub>/ZnS QDs with increasing the ratio of Cu.

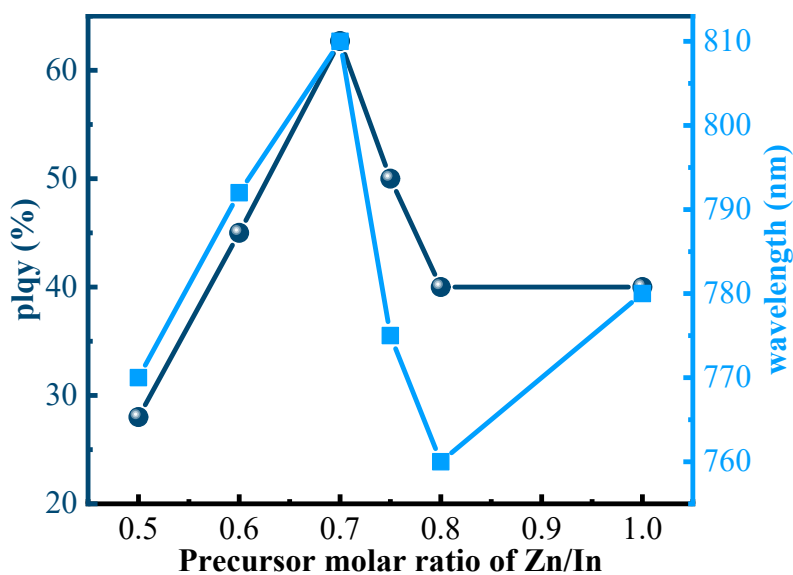

**Fig. S4** The variations of PL peak wavelength and PLQY of Zn: CuInSe<sub>2</sub>/ZnS QDs synthesized under different Zn/In molar ratios.

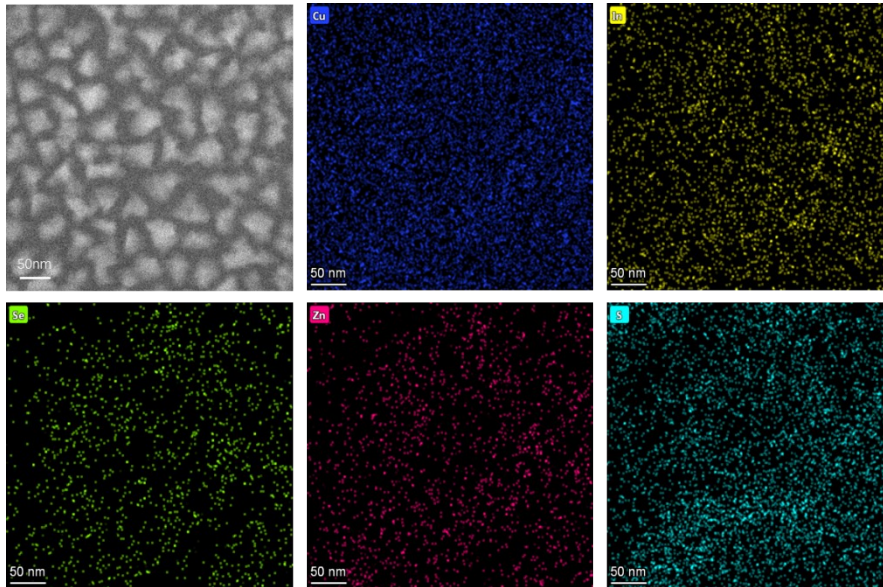

**Fig. S5** Energy dispersive spectroscopy (EDS) image of Zn: CuInSe<sub>2</sub>/ZnS revealing a uniform distribution of all constituent elements (Cu, In, Se, Zn, and S) in the Zn: CuInSe<sub>2</sub>/ZnS QDs lattice.

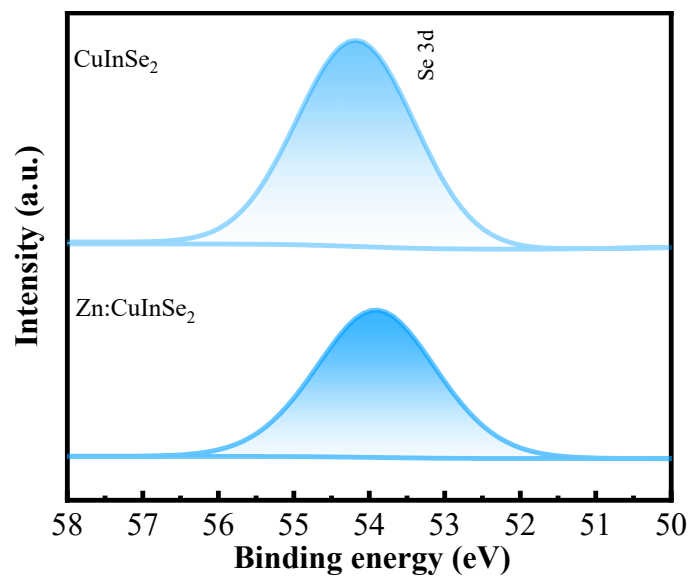

**Fig. S6** High-resolution scans of the Se-3d XPS spectra.

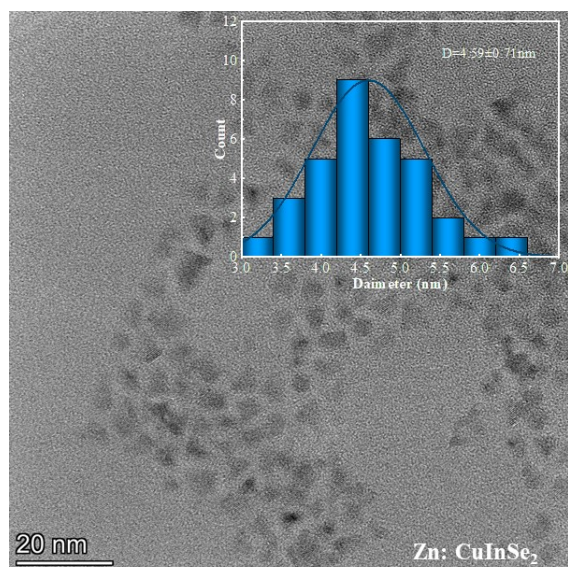

**Fig. S7** Transmission electron microscopy (TEM) images and size distribution of Zn: CuInSe<sub>2</sub> QDs. It can be seen that all of the samples are very mono-dispersed without any aggregates and the average particle size is  $4.59 \pm 0.71$  nm.

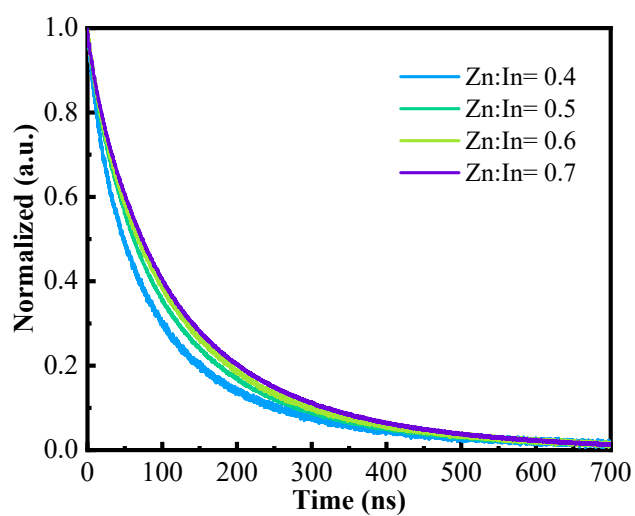

**Fig. S8** The variation of the transient spectra of Zn: CuInSe<sub>2</sub>/ZnS QDs with increasing the ratio of Zn.

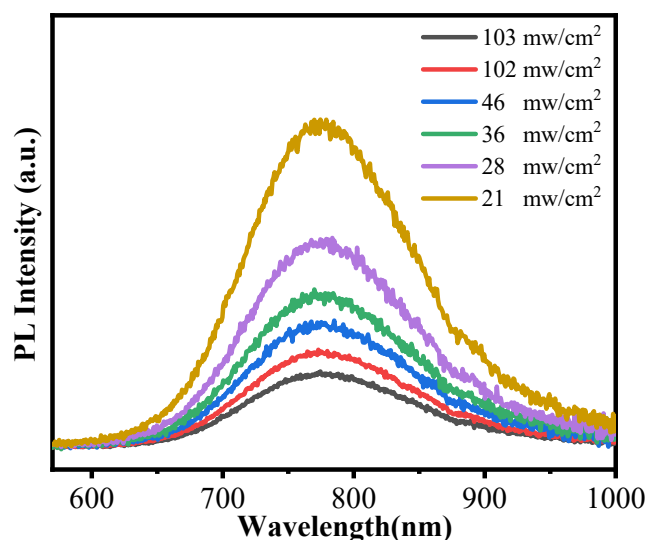

**Fig. S9** Variation of PL spectra under different laser power levels.

**Table S1.** Comparison of the quantum dots synthesized in this work with different near-infrared material systems.

| Year | Materials                                                                                                      | Wavelength    | PLQY         | Application field                 | ref.            |
|------|----------------------------------------------------------------------------------------------------------------|---------------|--------------|-----------------------------------|-----------------|
| 2024 | AgInS <sub>2</sub>                                                                                             | 680 nm        | 24%          | Biomedical Optical Imaging        | 32              |
| 2023 | Zn: CuInSe <sub>2</sub> /ZnS                                                                                   | 780 nm        | 21%          | Up-conversion Optics              | 33              |
| 2020 | CuInSe <sub>2</sub> /CuInS <sub>2</sub>                                                                        | 950 nm        | 8%           | Basic Materials Research          | 34              |
| 2022 | Cs <sub>2</sub> Na <sub>1-x</sub> Ag <sub>x</sub> Bi <sub>1-y</sub> Al <sub>y</sub> Cl <sub>6</sub> perovskite | 715 nm        | 48.6%        | Basic Materials Research          | 35              |
| 2024 | InP                                                                                                            | 740 nm        | 52%          | Basic Materials Research          | 36              |
| 2020 | Ag(InGa)Se <sub>2</sub>                                                                                        | 800 nm        | 38%          | Biomedical Optical Imaging        | 37              |
| 2024 | CuInSe <sub>2</sub> /ZnS                                                                                       | 878 nm        | 61%          | Luminescent solar concentrator    | 38              |
| 2024 | CuInS <sub>2</sub> /ZnS                                                                                        | 780 nm        | 70%          | Luminescent solar concentrator    | 39              |
| 2020 | CuInSe <sub>2</sub> ZnS                                                                                        | 920-1224 nm   | 21.8%        | Biomedical Optical Imaging        | 40              |
| 2024 | <b>Zn: CuInSe<sub>2</sub>/ZnS</b>                                                                              | <b>810 nm</b> | <b>62.7%</b> | <b>NIR Wireless Communication</b> | <b>our work</b> |

**Table S2.** Demonstrates the significant competitive advantage of the modulation bandwidth measured in this study within the near-infrared range.

| Year        | Application field                 | Modulation bandwidth | ref.            |
|-------------|-----------------------------------|----------------------|-----------------|
| 2020        | NIR OLED                          | 390 kHz              | 4               |
| 2023        | High-speed OPD                    | 4 MHz                | 61              |
| 2023        | Photodetector                     | 7.9 kHz              | 62              |
| 2021        | white light-emitting diodes       | 1.5 MHz              | 63              |
| <b>2024</b> | <b>NIR Wireless Communication</b> | <b>3.23 MHz</b>      | <b>our work</b> |
